# Supplementary material for: Tailored honeycomb-like polymeric films based on amphiphilic poly(urea/malonamide) dendrons
Source: Royal Society of Chemistry journal article supplement (doi:10.1039/c6ra15636c), 2016-01-01
Supplement: c6ra15636c1.pdf [file c6ra15636c1.pdf]

## Electronic Supplementary Information

### Tailored Honeycomb-like Polymeric Films Based on Amphiphilic Poly(urea/malonamide) Dendrons

Chien-Hsin Wu,<sup>a</sup> Wei-Ho Ting,<sup>b</sup> Yu-Wen Lai,<sup>a</sup> Shenghong A. Dai,<sup>b</sup> Wen-Chiung Su,<sup>c</sup> Shih-Huang Tung\*<sup>a</sup> and Ru-Jong Jeng\*<sup>a</sup>

<sup>a</sup>*Institute of Polymer Science and Engineering, National Taiwan University, Taipei 106, Taiwan. E-mail: [rujong@ntu.edu.tw](mailto:rujong@ntu.edu.tw)*

<sup>b</sup>*Department of Chemical Engineering, National Chung Hsing University, Taichung 402, Taiwan.*

<sup>c</sup>*National Chung Shan Institute of Science and Technology, Taoyuan 325, Taiwan*

\*Corresponding author. RJJ, Tel.: +886-2-3366-5884; Fax: +886-2-3366-5237

E-mail: [shtung@ntu.edu.tw](mailto:shtung@ntu.edu.tw) (SHT); [rujong@ntu.edu.tw](mailto:rujong@ntu.edu.tw) (RJJ)

**Fig. S1** Infrared spectra of (a) poly(urea/malonamide) dendrons, (b) E-series amphiphilic poly(urea/malonamide) dendrons, and (c) B-series amphiphilic poly(urea/malonamide) dendrons.

**Fig. S2** <sup>1</sup>H NMR spectra of poly(urea/malonamide) dendrons.

**Table S1** Solubility of poly(urea/malonamide) dendrons.

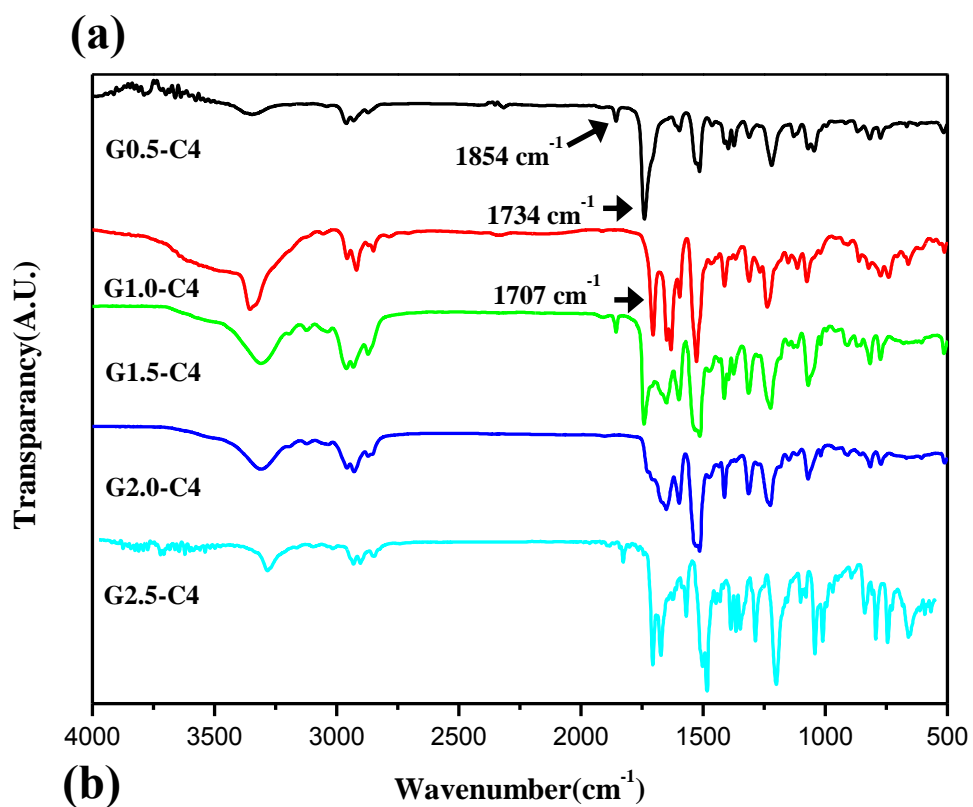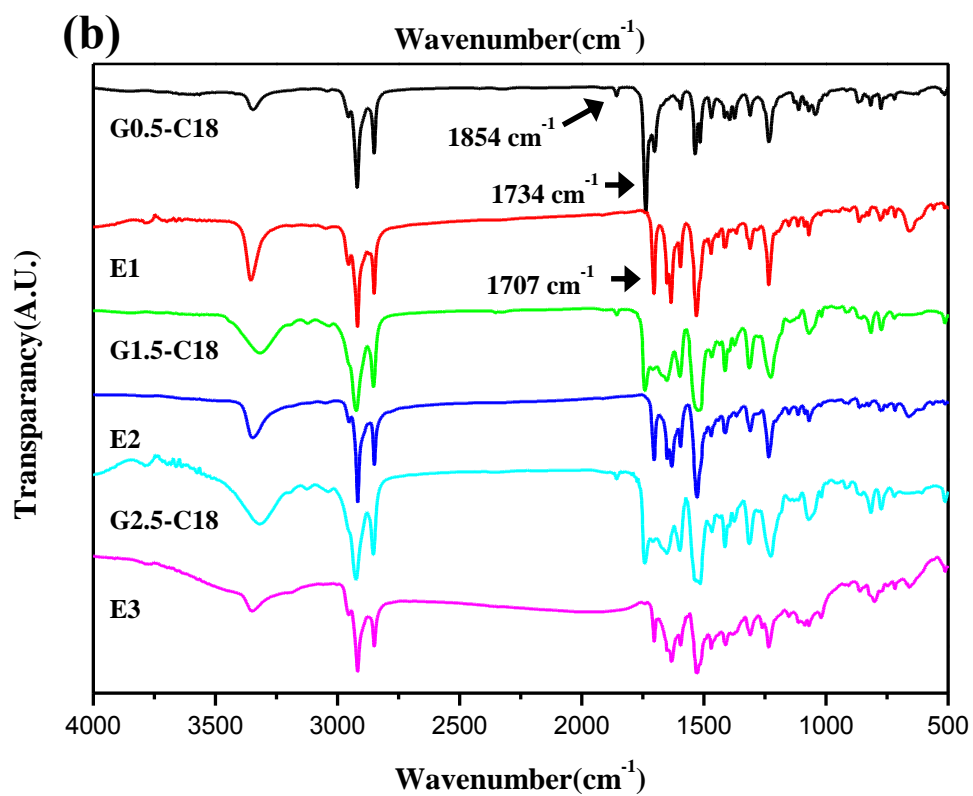

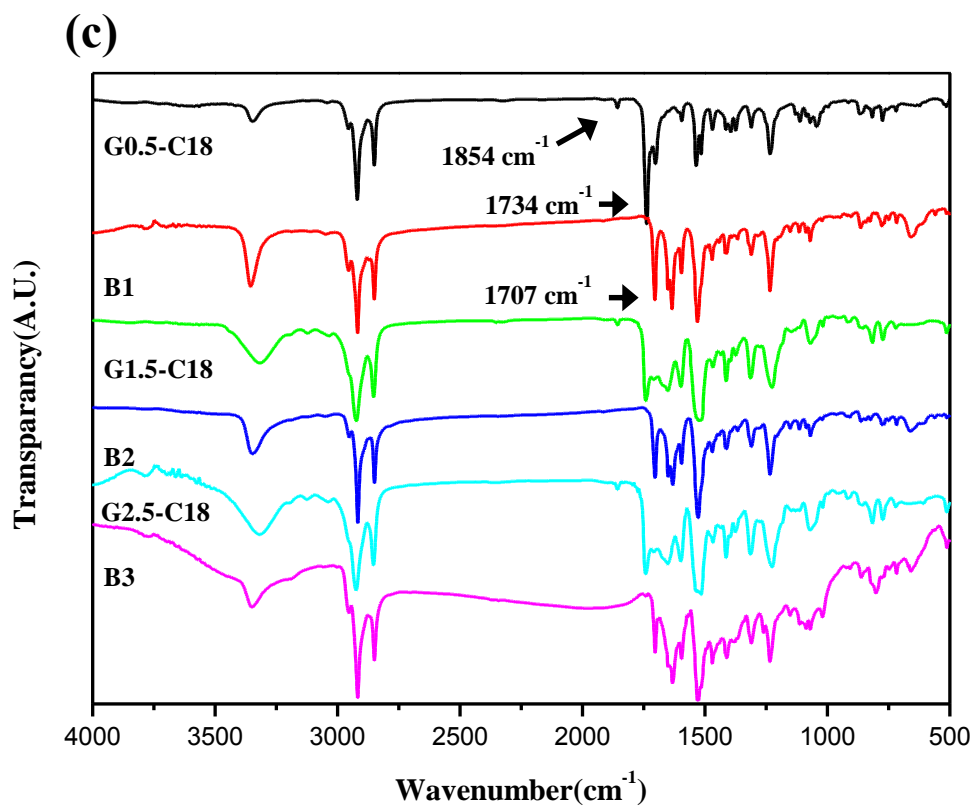

**Fig. S1** Infrared spectra of (a) poly(urea/malonamide) dendrons, (b) E-series amphiphilic poly(urea/malonamide) dendrons, and (c) B-series amphiphilic poly(urea/malonamide) dendrons.

G0.5-C4

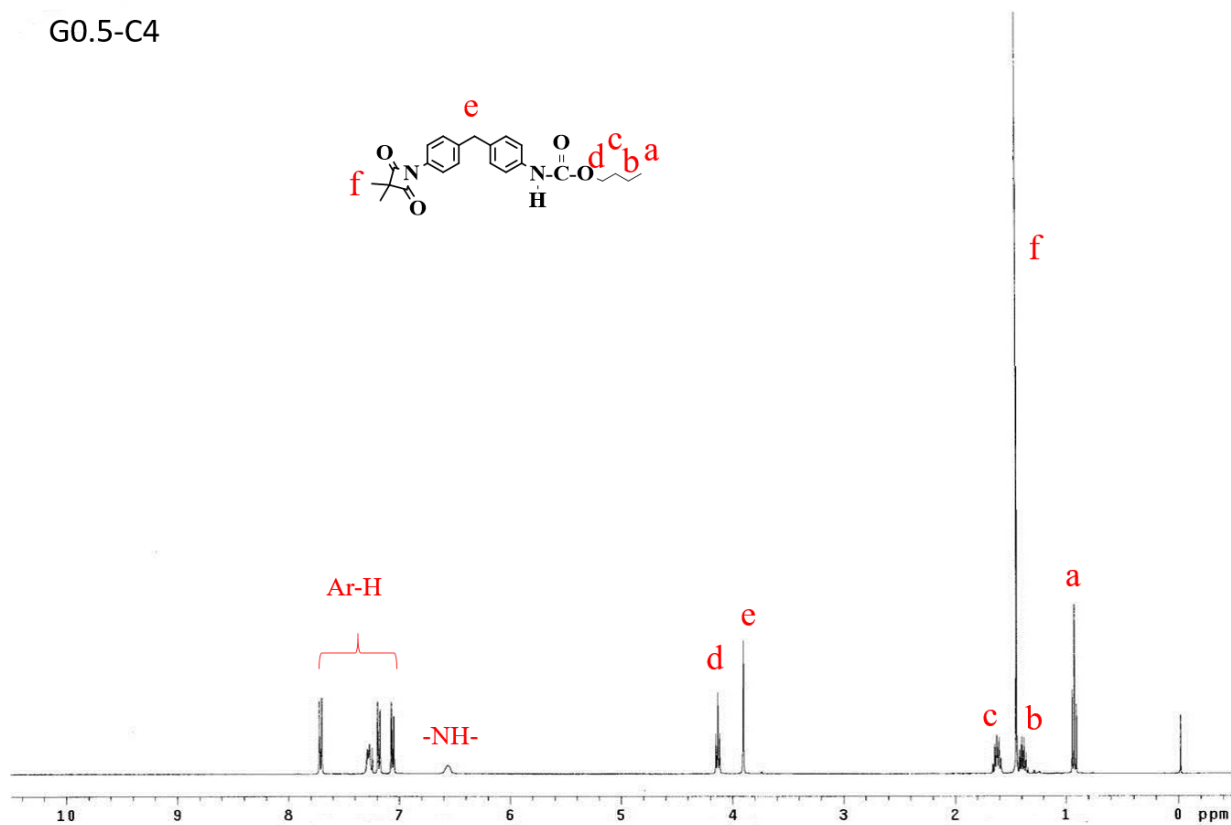

G1.0-C4

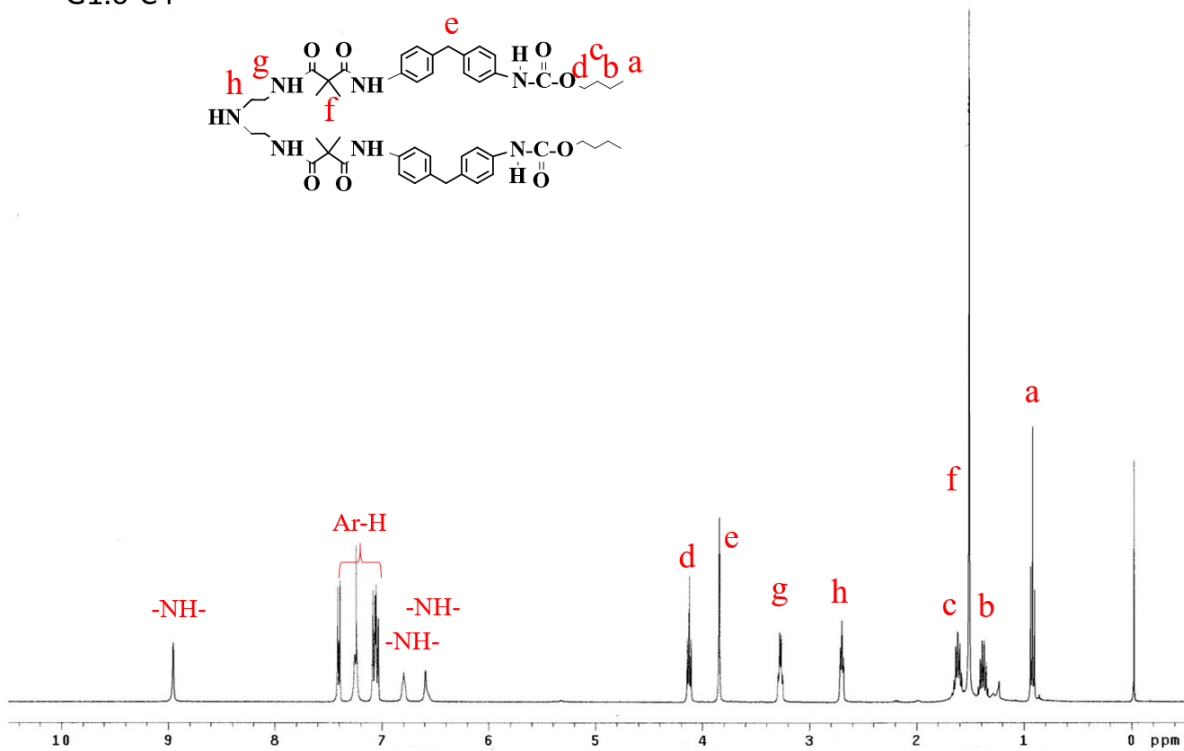

G1.5-C4

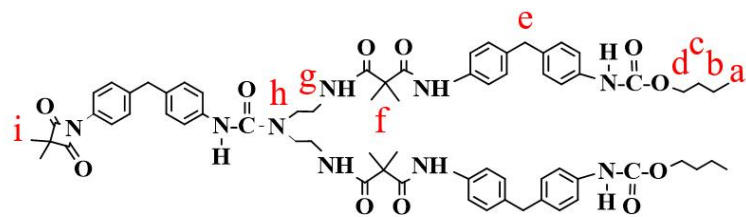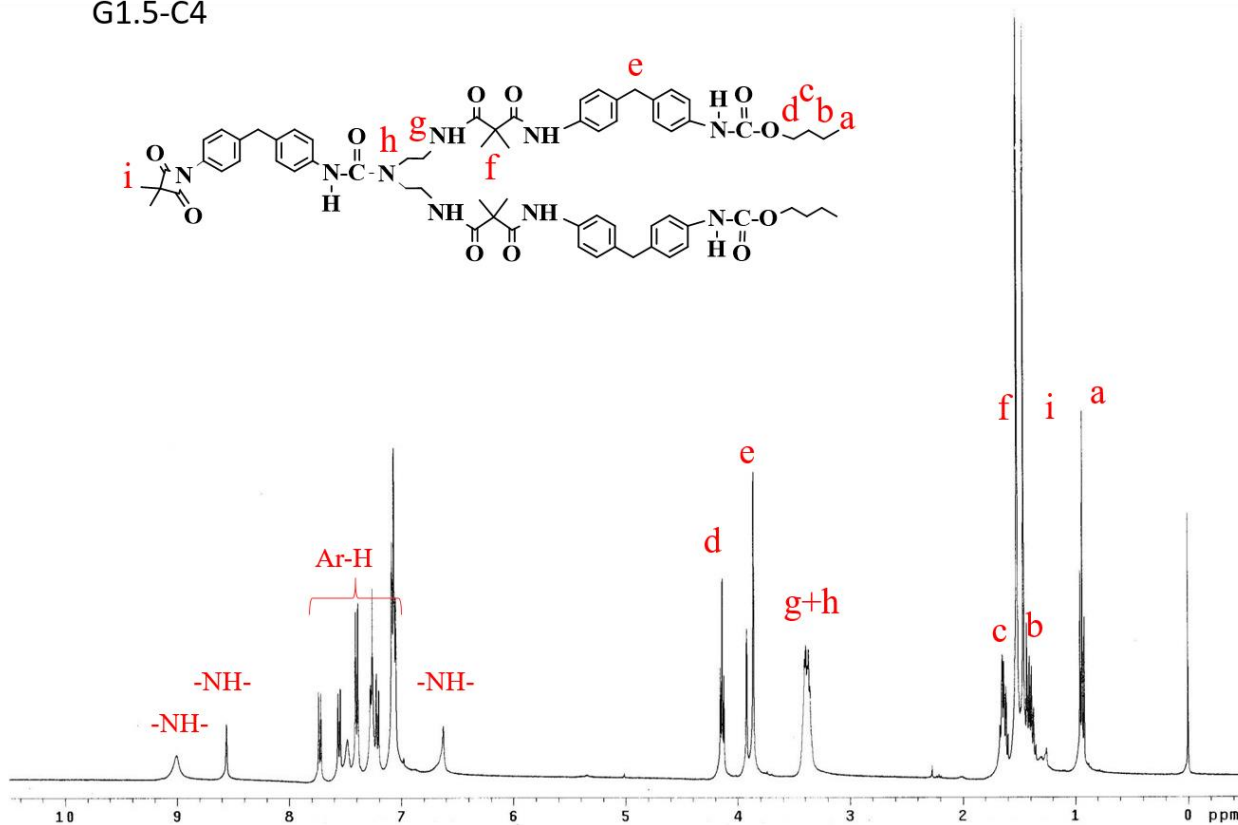

G2.0-C4

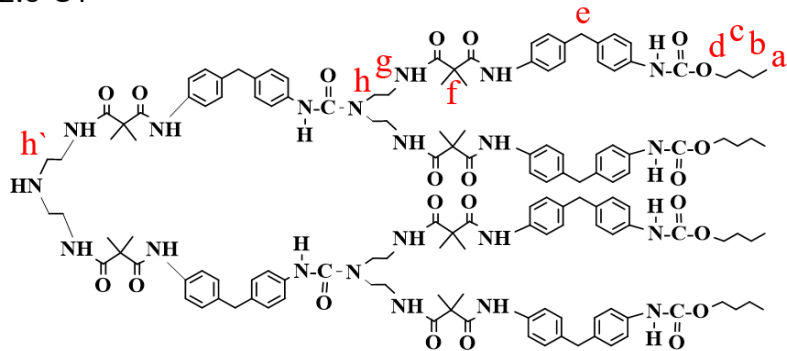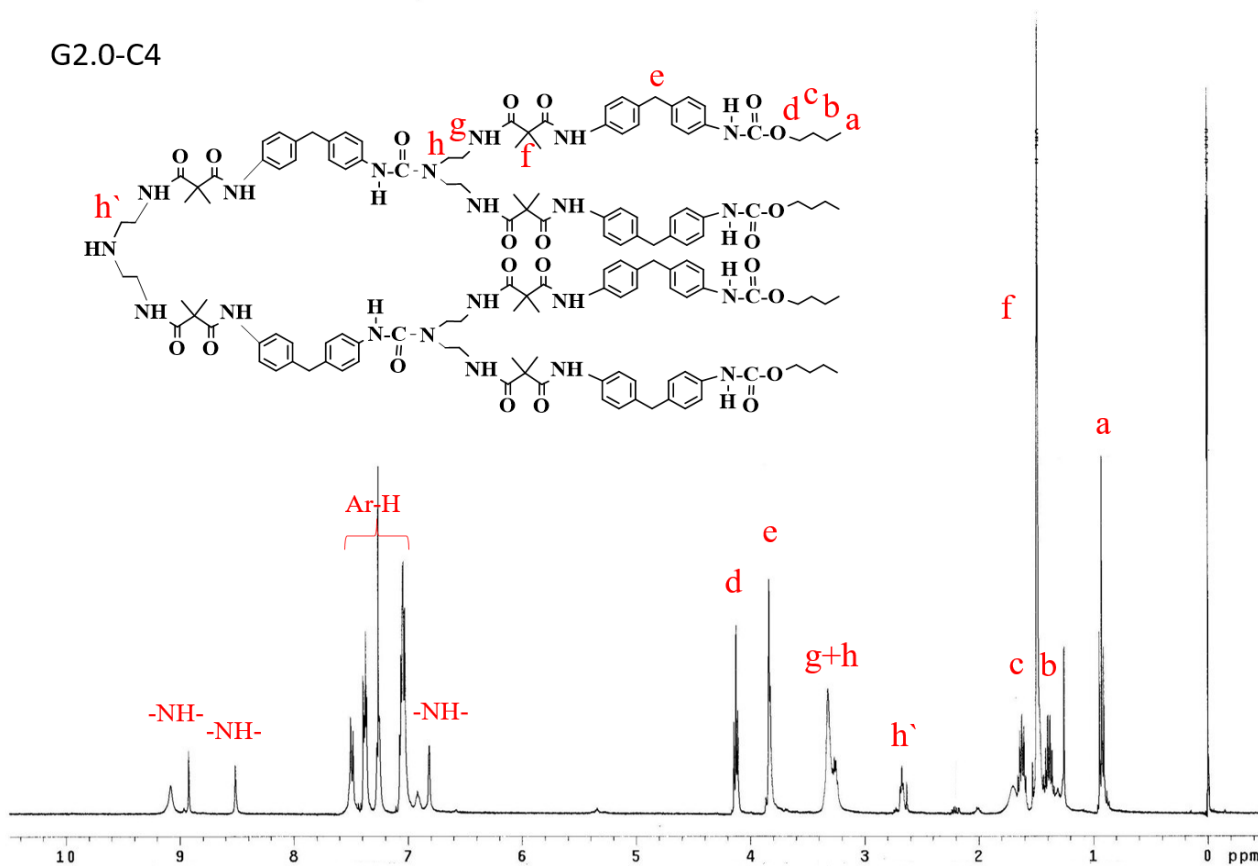

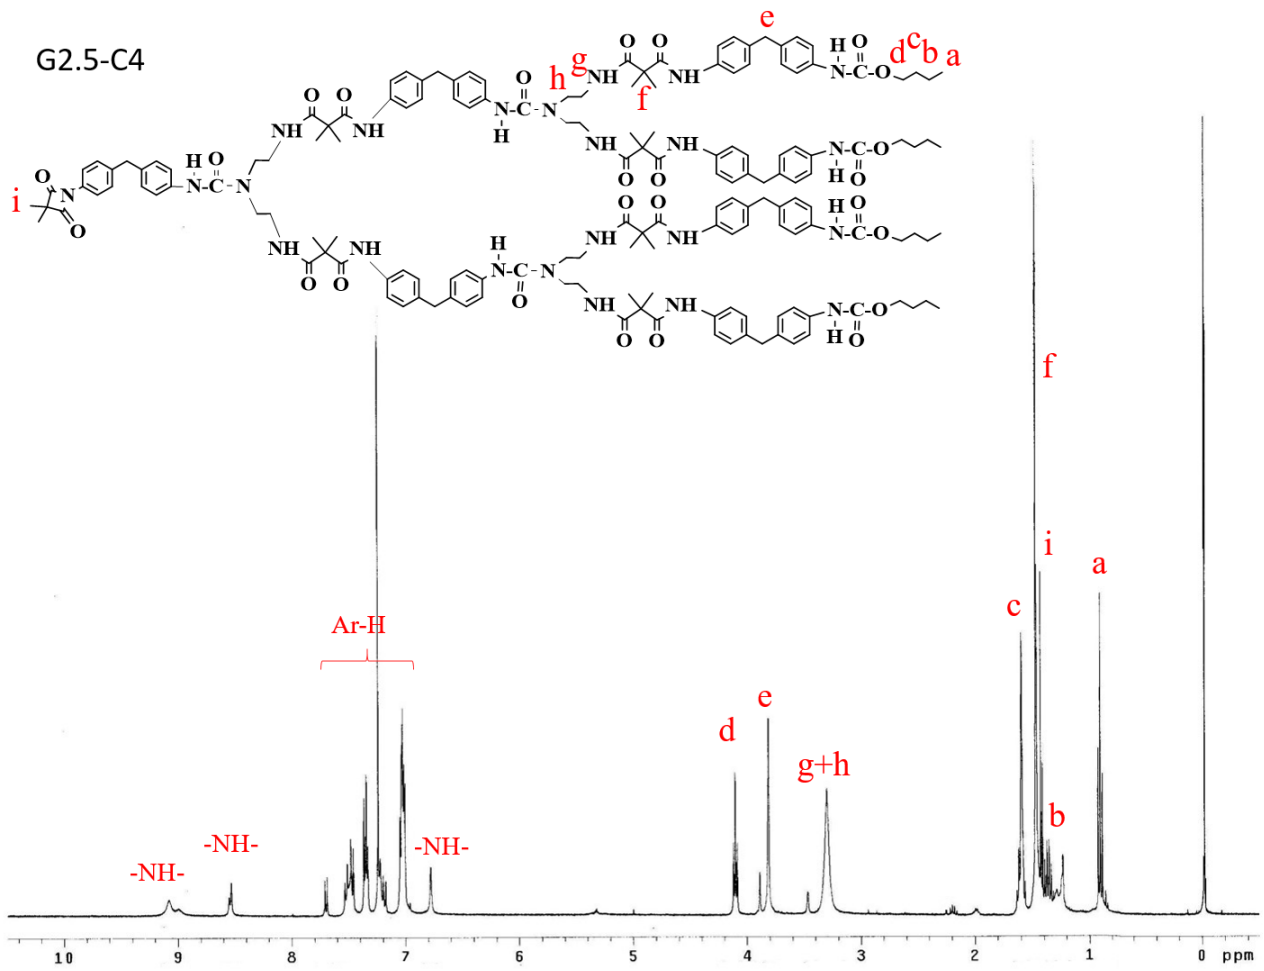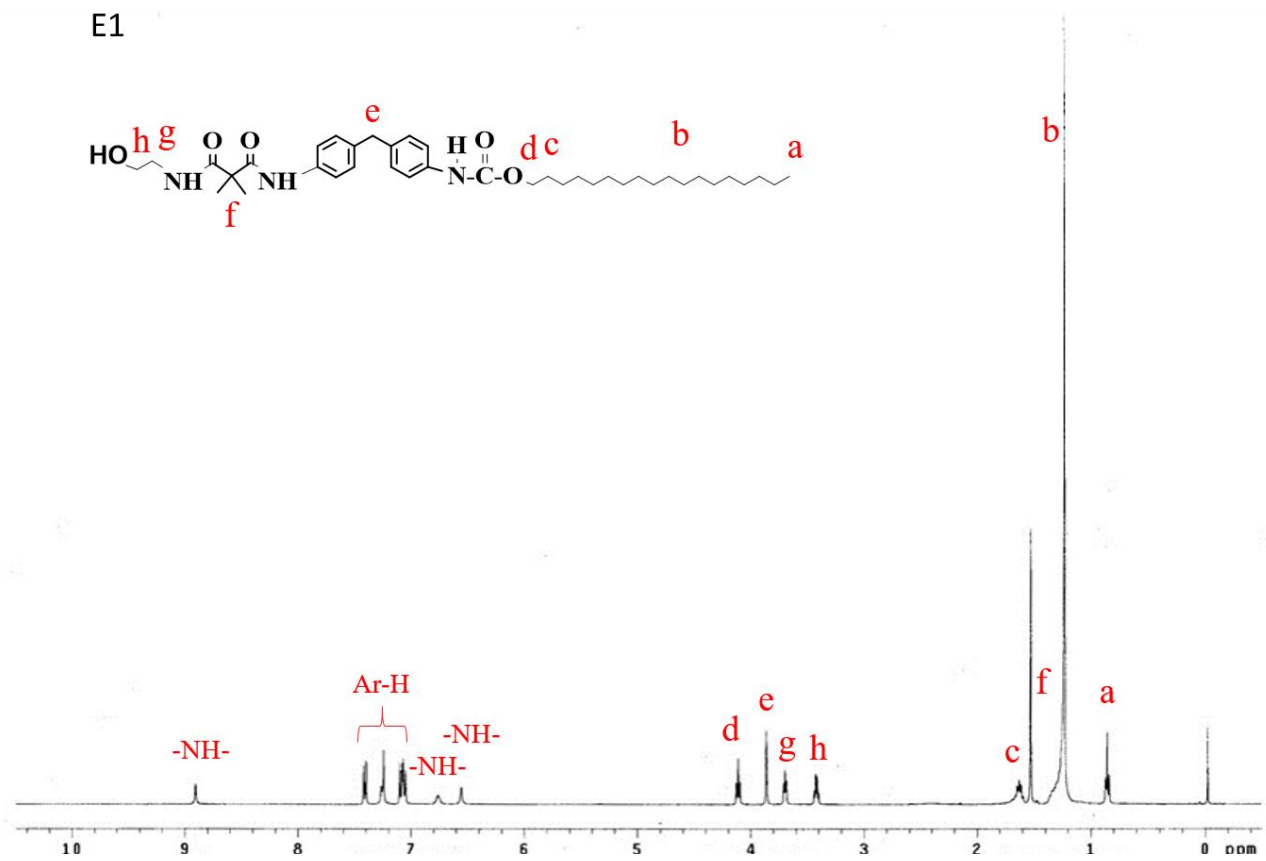

E2

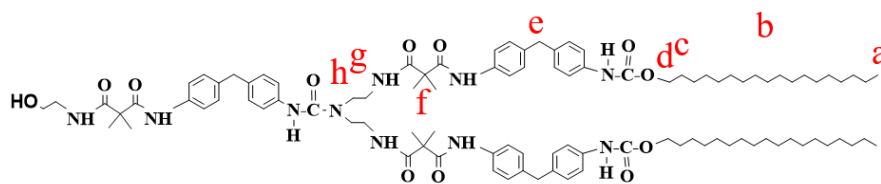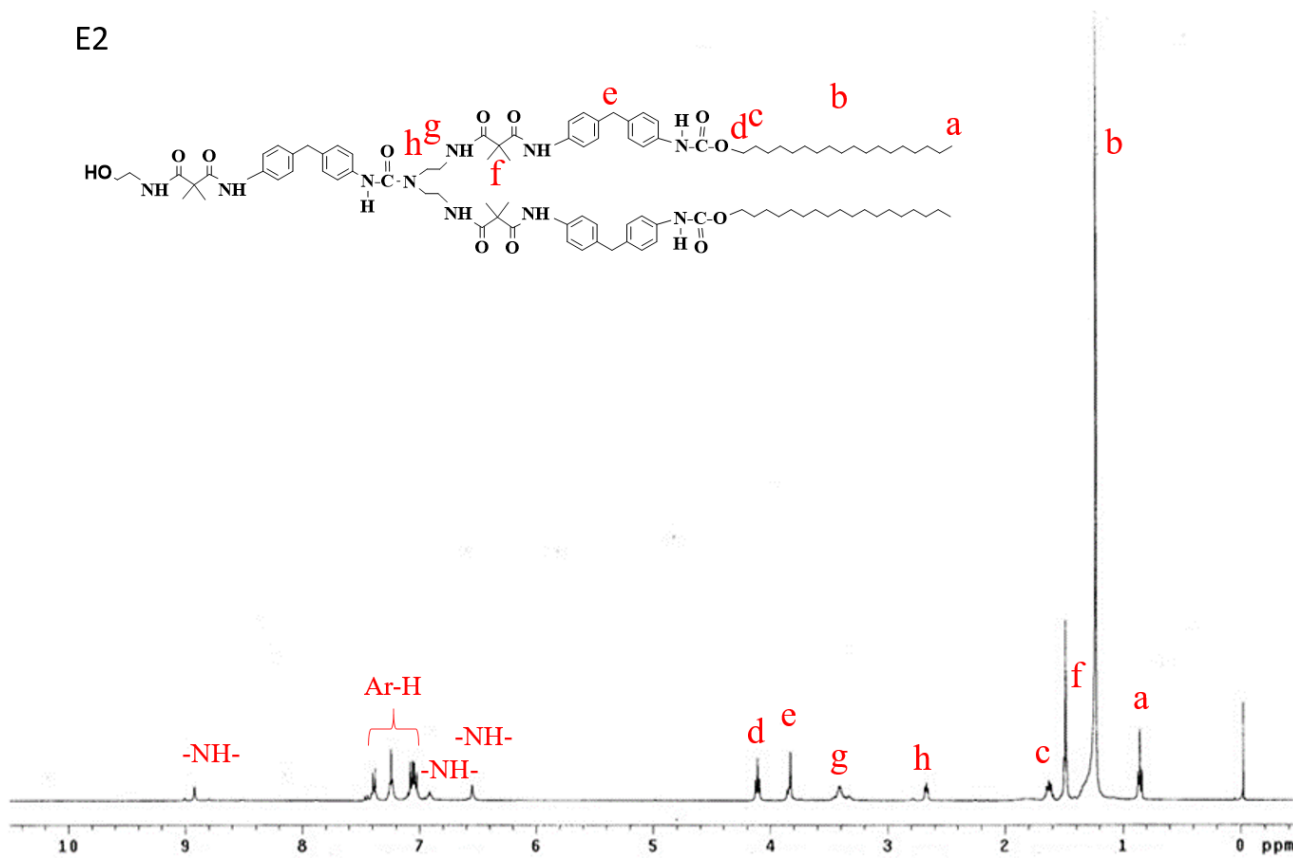

E3

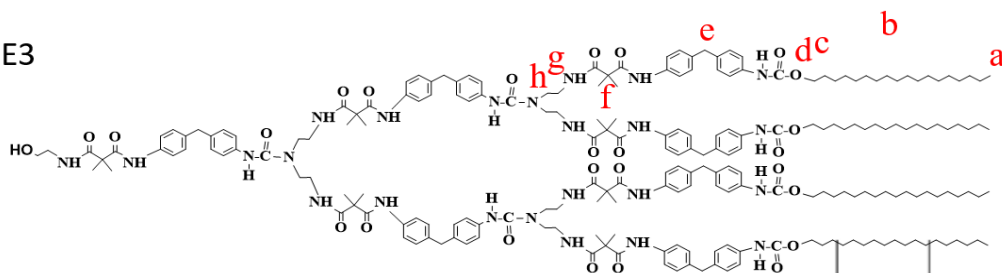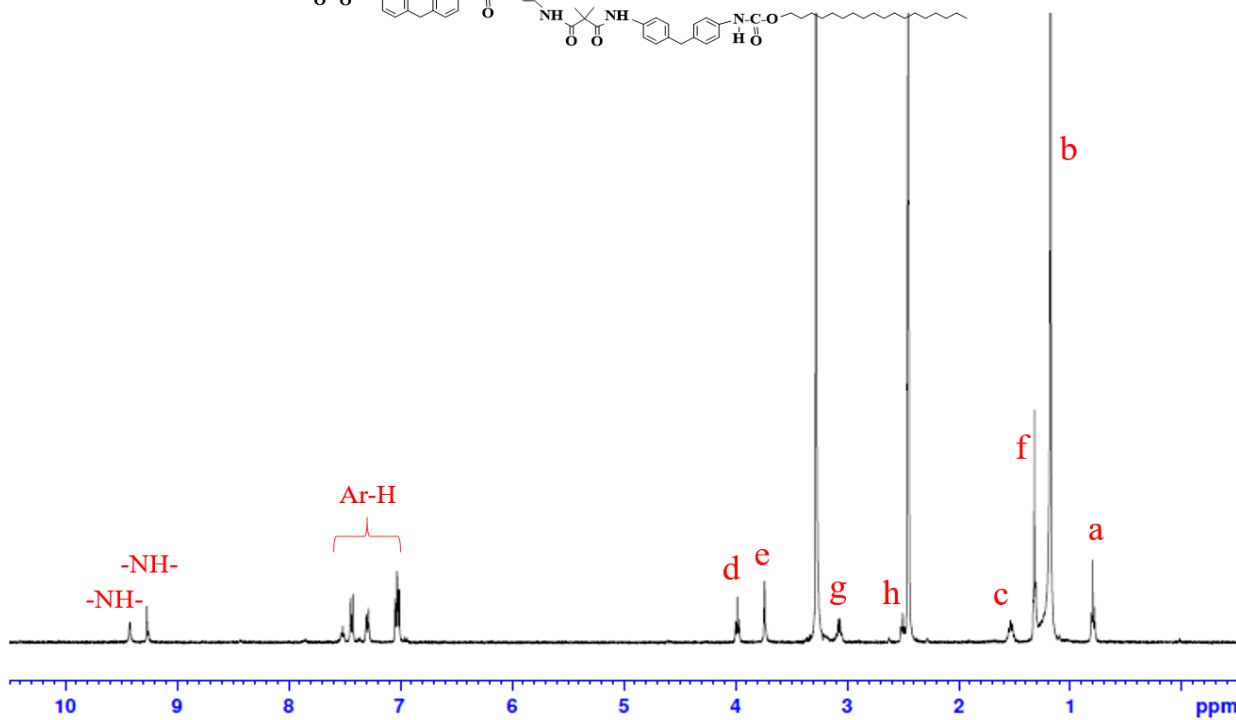

B1

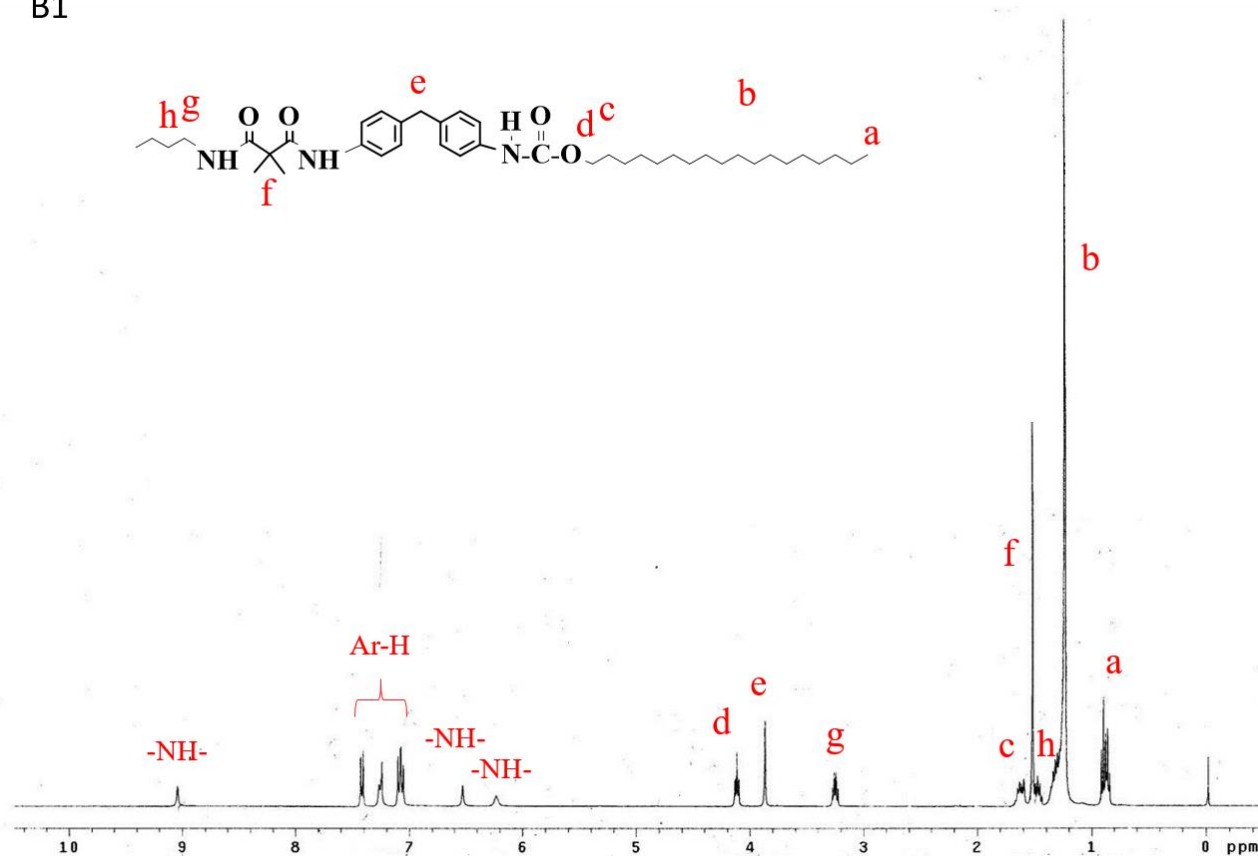

B2

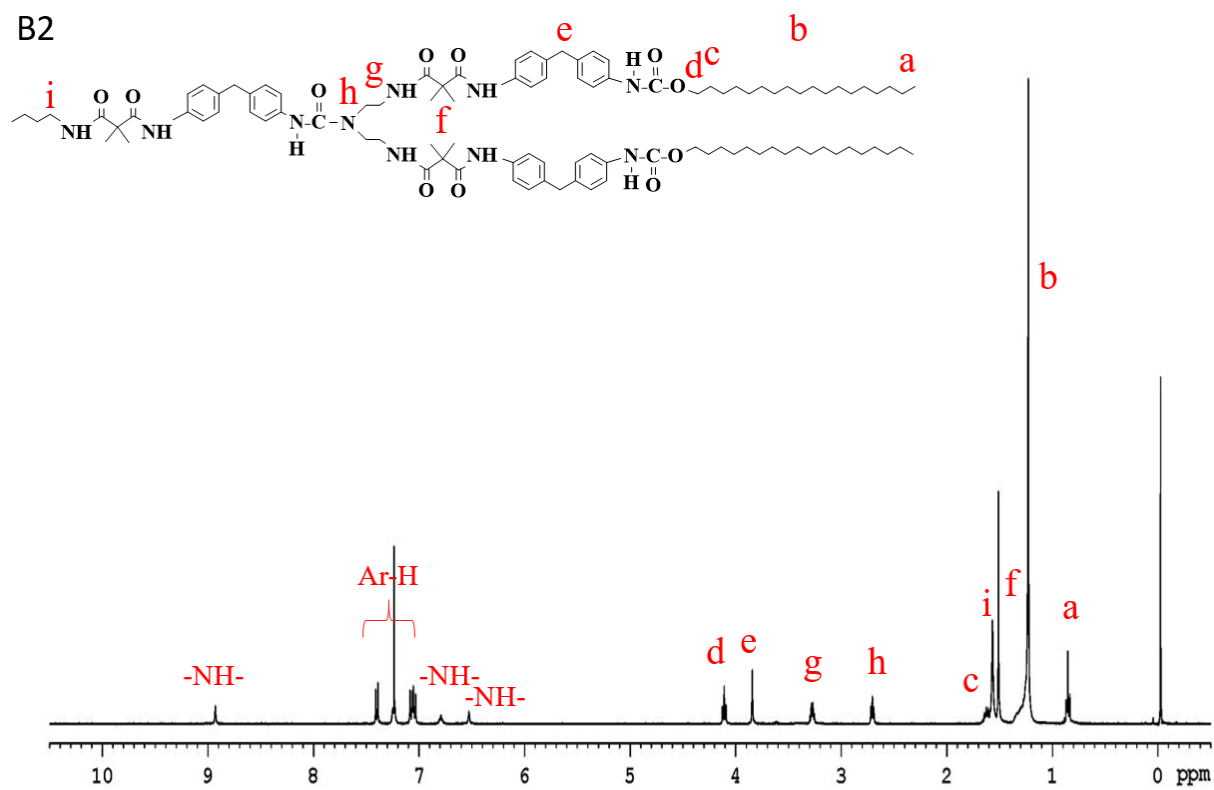



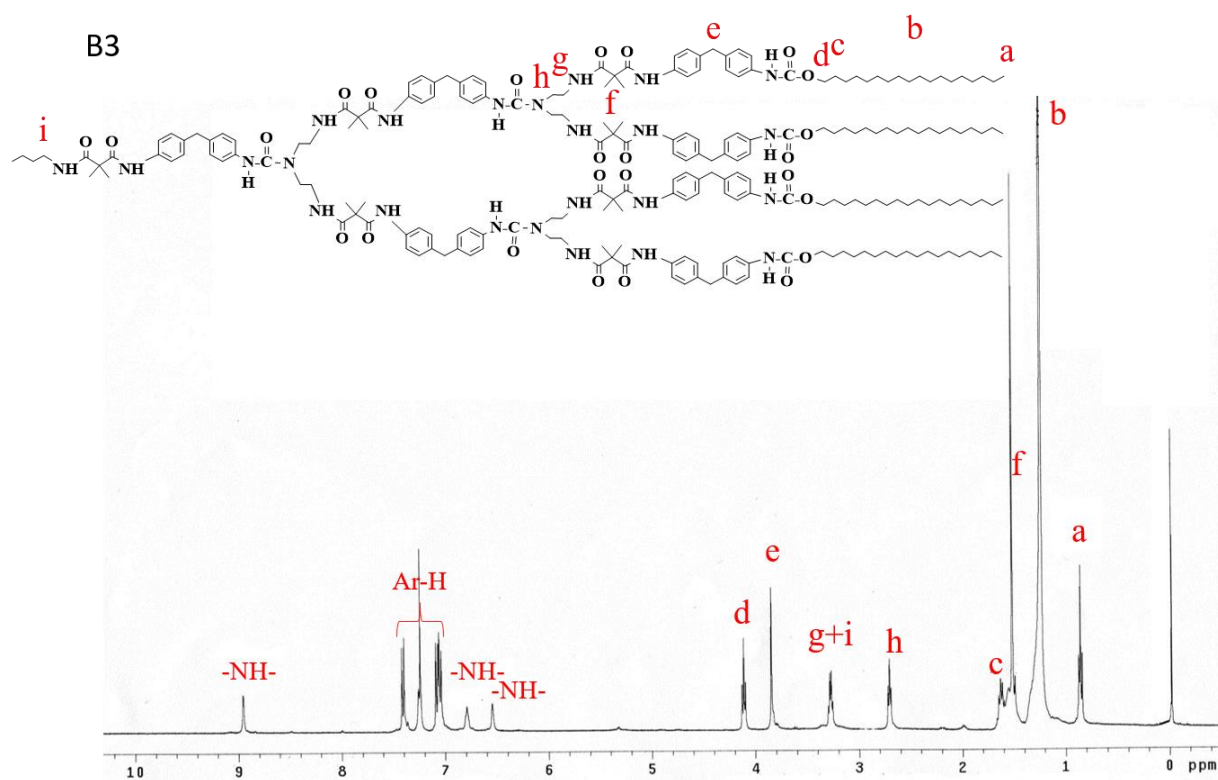

**Fig. S2**  $^1\text{H}$  NMR spectra of poly(urea/malonamide) dendrons.

**Table S1** Solubility of poly(urea/malonamide) dendrons.

| Sample         | Toluene | Chloroform | THF | Acetone | EA | DMSO | Ethanol | Methanol |
|----------------|---------|------------|-----|---------|----|------|---------|----------|
| <b>G0.5-C4</b> | +       | +          | +   | +       | +  | +    | +       | +        |
| <b>G1.0-C4</b> | -       | +          | +-  | +       | -  | +    | +-      | +-       |
| <b>G1.5-C4</b> | -       | +          | +   | +       | +  | +    | +       | +        |
| <b>G2.0-C4</b> | -       | +          | +   | +       | +  | +    | +-      | +-       |
| <b>G2.5-C4</b> | -       | +          | +   | +       | +  | +    | +-      | +-       |
| <b>B1</b>      | +-      | +          | +   | +       | +  | +-   | -       | -        |
| <b>B2</b>      | -       | +          | +   | +-      | +  | +-   | -       | -        |
| <b>B3</b>      | -       | +          | +   | +-      | +  | +-   | -       | -        |
| <b>E1</b>      | +-      | +          | +   | +       | +- | +    | +-      | +-       |
| <b>E2</b>      | -       | +          | +   | +-      | -  | +-   | -       | -        |
| <b>E3</b>      | -       | +          | +   | +-      | -  | +-   | -       | -        |
| <b>A1</b>      | -       | +          | +   | +       | +  | +    | +-      | -        |
| <b>A2</b>      | +-      | +          | +   | +       | +  | +    | -       | -        |
| <b>A3</b>      | +       | +          | +   | +       | +  | +    | -       | -        |

Qualitative solubility were determined with 10 mg of samples in 1 ml of solvent.

+: soluble at RT; +-: soluble after heating to 60 °C; -: Insoluble even at 60 °C.
